# Supplementary material for: Design of an aptamer – based fluorescence displacement biosensor for selective and sensitive detection of kanamycin in aqueous samples
Source: Royal Society of Chemistry journal article supplement (doi:10.1039/c7ra07052g), 2017-01-01
Supplement: c7ra07052g1.pdf [file c7ra07052g1.pdf]

## Electronic Supporting Information

**Design an aptamer-based fluorescence displacement biosensor for selective and sensitive detection of kanamycin in aqueous-derived samples**

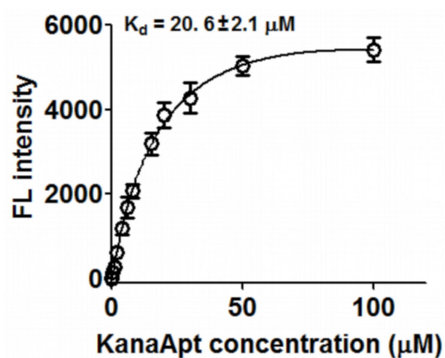

**Figure SI-1. Fluorescence intensities of 5 μM ThT at 492 nm with various concentrations of kanamycin A.** Triplicate independent experiments have been performed and error bars are give accordingly.

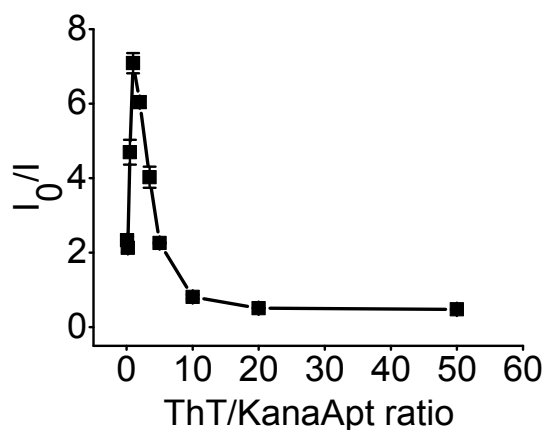

**Figure SI-2. The optimisation of ratio of ThT/KanaApt for kanamycin A detection.** Error bars represent the standard deviation in three individual experiments.

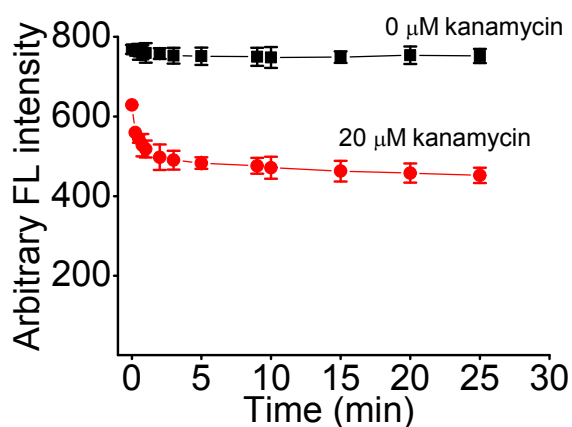

**Figure SI-3. The optimisation of incubation time of KanaApt-ThT complex in the absence or presence of kanamycin A.** Triplicate independent experiments have been performed and error bars are give accordingly.

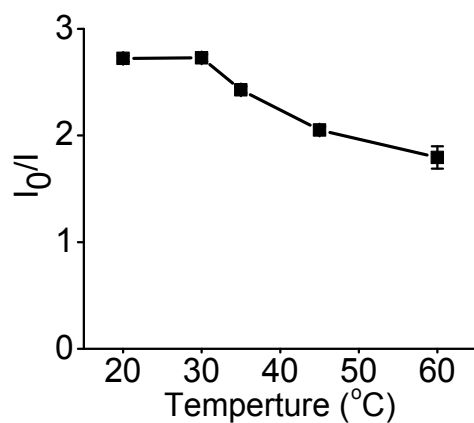

**Figure SI-4. The optimisation of incubation temperature of KanaApt-ThT complex in the presence of kanamycin A.** Triplicate independent experiments have been performed and error bars are give accordingly.

|          | Kanamycin A added (µM) | Measured (µM) mean <sup>a</sup> ± SD | Recovery (%) |
|----------|------------------------|--------------------------------------|--------------|
| Sample 1 | 0.1                    | 0.1049 ± 0.008                       | 104.9        |
| Sample 2 | 2.0                    | 1.896 ± 0.114                        | 94.8         |
| Sample 3 | 20.0                   | 18.40 ± 1.254                        | 92.0         |

a: Mean obtained from four separate measurements

**Table SI-1. Detection results of kanamycin A spiked in liquid milk.**

| Detection method/instrument           | Probes                                                                                                                       | Linear Range                                                               | (Limit of Detection) LOD | Real sample                                                 | Ref.             |
|---------------------------------------|------------------------------------------------------------------------------------------------------------------------------|----------------------------------------------------------------------------|--------------------------|-------------------------------------------------------------|------------------|
| UV-Vis spectroscopy                   | DNA aptamer functionalised gold NPs                                                                                          | 1-500 nM                                                                   | 1 nM                     | Milk                                                        | 1                |
|                                       | DNA aptamer functionalised gold NPs                                                                                          | –                                                                          | 25 nM                    | Aqueous solutions                                           | 2                |
|                                       | Gold nanoparticles (Nanozyme)                                                                                                | 0.1 nM-10 nM                                                               | 1.49 nM                  | Aqueous solutions                                           | 3                |
| HPLC                                  | Borate complexation                                                                                                          | –                                                                          | ~78 µM (38 µg/mL)        | Aqueous solutions                                           | 4                |
| Cantilever array sensor               | DNA aptamer                                                                                                                  | 100 µM to 10 mM                                                            | 50 µM                    | Aqueous solutions                                           | 5                |
| Fluorescence spectroscopy             | Thiazole orange (TO) and a DNA aptamer                                                                                       | 0.1 µM to 20 µM                                                            | 59 nM                    | Milk                                                        | 6                |
|                                       | <b>Thioflavin T (ThT) and a DNA aptamer</b>                                                                                  | <b>1 nM to 300 µM</b>                                                      | <b>300 pM</b>            | <b>Aqueous solutions</b>                                    | <b>This work</b> |
| luminescence                          | Platinum (II) complex with DNA aptamer                                                                                       | 0.2-150 µM                                                                 | 143 nM                   | Aqueous solutions                                           | 7                |
| Electrochemical aptasensor            | DNA aptamer with chitosan-gold NPs, graphene-gold NPs and multi-walled carbon nanotubes-cobalt phthalocyanine nanocomposites | 10 nM to 150 nM                                                            | 5.8 nM                   | Milk                                                        | 8                |
|                                       | Thionine, graphene-polyaniline composite film, and gold NPs                                                                  | ~0.02nM ~413nM (0.01 to 200 ng/mL)                                         | ~17.7 nM (8.6 ng/mL)     | Milk                                                        | 9                |
|                                       | Conducting polymer/gold self-assembled nanocomposite                                                                         | 0.05-9.0 µM                                                                | 9.4 ± 0.4 nM             | Milk                                                        | 10               |
| Electrochemical immunosensor          | Ag@Fe3O4 nanoparticle and thionine mixed graphene sheet (TH-GS)                                                              | ~103 pM to ~33 nM (0.050 to 16 ng/mL)                                      | ~0.03 nM (15 pg/mL)      | Pork meat                                                   | 11               |
|                                       | Graphene sheet (GS) -nafion (Nf)/thionine (TH)/Pt nanoparticles modified                                                     | ~21 pM to ~25 nM (0.01 to 12.0 ng/mL)                                      | ~12 pM (5.74 pg/mL)      | Chicken liver                                               | 12               |
| Capillary electrophoresis (CE)        |                                                                                                                              | ~43 nM to ~103 µM (2.1 × 10 <sup>-5</sup> to 5.0 × 10 <sup>-2</sup> mg/mL) | ~14 nM (7 ng/mL)         | Milk                                                        | 13               |
|                                       |                                                                                                                              | ~5.2 µM to ~2mM (2.5 to 1000 µg/mL)                                        | ~1440 nM (0.7 µg/mL)     | Aqueous solutions                                           | 14               |
| Surface plasmon resonance (SPR)       | Gold nanoparticles (AuNPs)                                                                                                   | 20-800 nM                                                                  | 2 nM                     | Human urine                                                 | 15               |
|                                       | Imprinted BoronicAcid-Functionalized Au Nanoparticle Composites                                                              | 1 pM to 1 nM                                                               | 1 pM                     | Milk                                                        | 16               |
| ELISA                                 | Antibody                                                                                                                     | –                                                                          | ~43 nM (21 ng/mL)        | Milk                                                        | 17               |
|                                       | Antibody                                                                                                                     | ~0.4 to ~100 nM (0.2-50 ng/mL)                                             | ~0.4 nM (0.2 ng/mL)      | Cattle milk, cattle plasma, cattle urine and chicken plasma | 18               |
| ELISA and immunochromatographic assay | Antibody                                                                                                                     | –                                                                          | ~2 nM (1.0 ng/mL)        | PBS solution, plasma and milk                               | 19               |
| Biosensor immunoassay (BIA)           | Antibody                                                                                                                     | –                                                                          | ~31 nM (15 ng/ml)        | Milk                                                        | 20               |

**Table SI-2. A summary of our proposed approach with others for detection of kanamycin A.**

#### References:

1. N. Zhou, J. Zhang and Y. Tian, *Anal. Methods-UK*, 2014, **6**, 1569-1574.
2. K.-M. Song, M. Cho, H. Jo, K. Min, S. H. Jeon, T. Kim, M. S. Han, J. K. Ku and C. Ban, *Anal. Biochem.*, 2011, **415**, 175-181.
3. T. K. Sharma, R. Ramanathan, P. Weerathunge, M. Mohammadtaheri, H. K. Daima, R. Shukla and V. Bansal, *Chem. Commun.*, 2014, **50**, 15856-15859.
4. B. Blanchaert, E. Poderós Jorge, P. Jankovics, E. Adams and A. Van Schepdael, *Chromatographia*, 2013, **76**, 1505-1512.
5. X. Bai, H. Hou, B. Zhang and J. Tang, *Biosens. Bioelectron.*, 2014, **56**, 112-116.
6. Y. P. Xing, C. Liu, X. H. Zhou and H. C. Shi, *Sci. Rep.*, 2015, **5**, 8125.
7. K.-H. Leung, H.-Z. He, D. S.-H. Chan, W.-C. Fu, C.-H. Leung and D.-L. Ma, *Sensor Actuat. B-Chem.*, 2013, **177**, 487-492.
8. X. Sun, F. Li, G. Shen, J. Huang and X. Wang, *Analyst*, 2014, **139**, 299-308.

9. F. Li, Y. Guo, X. Sun and X. Wang, *Eur. Food Res. Technol.*, 2014, **239**, 227-236.
10. Y. Zhu, P. Chandra, K.-M. Song, C. Ban and Y.-B. Shim, *Biosens. Bioelectron.*, 2012, **36**, 29-34.
11. S. Yu, Q. Wei, B. Du, D. Wu, H. Li, L. Yan, H. Ma and Y. Zhang, *Biosens. Bioelectron.*, 2013, **48**, 224-229.
12. Q. Wei, Y. Zhao, B. Du, D. Wu, H. Li and M. Yang, *Food Chem.*, 2012, **134**, 1601-1606.
13. C.-Z. Yu, Y.-Z. He, G.-N. Fu, H.-Y. Xie and W.-E. Gan, *J. Chromatogr. B*, 2009, **877**, 333-338.
14. M. N. El-Attug, E. Adams, J. Hoogmartens and A. Van Schepdael, *J. Sep. Sci.*, 2011, **34**, 2448-2454.
15. X. Wang, M. Zou, X. Xu, R. Lei, K. Li and N. Li, *Anal. Bioanal. Chem.*, 2009, **395**, 2397-2403.
16. M. Frasconi, R. Tel-Vered, M. Riskin and I. Willner, *Anal. Chem.*, 2010, **82**, 2512-2519.
17. E. E. M. G. Loomans, J. van Wiltenburg, M. Koets and A. van Amerongen, *J. Agr. Food Chem.*, 2003, **51**, 587-593.
18. H. Watanabe, A. Satake, Y. Kido and A. Tsuji, *Analyst*, 1999, **124**, 1611-1615.
19. Y. Jin, J.-W. Jang, C.-H. Han and M.-H. Lee, *J. Vet. Sci.*, 2006, **7**, 111-117.
20. W. Haasnoot, G. Cazemier, M. Koets and A. van Amerongen, *Anal. Chim. Acta*, 2003, **488**, 53-60.
